# Supplementary material for: Toxoplasma gondii induces prolonged host epidermal growth factor receptor signalling to prevent parasite elimination by autophagy: Perspectives for in vivo control of the parasite
Source: PubMed Central journal article supplement — Cell Microbiol. 2019 Jul 17;21(10):e13084. doi: 10.1111/cmi.13084 (PMC6771541; doi:10.1111/cmi.13084), 2019-07-17

## SUPPLEMENTAL INFORMATION

**Figure S1. Effects of kinase inhibitors on parasite survival.** *A*, RPE cells were challenged with PTG *T. gondii* followed by addition of Gefitinib or vehicle 2 h after infection. Monolayers were examined at 24 h to determine the numbers of *T. gondii*-containing vacuoles per 100 cells. *B-F*, Parental CHO cells, CHO cells with stable expression of EGFR (*B*), mouse endothelial cells (mHEVc) transduced with Src shRNA or control shRNA (*C*) and human RPE cells transfected with PKC $\alpha$ /PKC $\beta$  siRNA (*D*), Akt siRNA (*E*), STAT3 siRNA (*F*) or control siRNA were challenged with RH *T. gondii*. Gefitinib (1  $\mu$ M), PP2 (2  $\mu$ M), Gö 6976 (1  $\mu$ M), Akt inhibitor IV (1.25  $\mu$ M) or vehicle were added 2 h after challenge with *T. gondii* as indicated. Stattic (5  $\mu$ M) was added 1 h prior to infection. Monolayers were examined at 24 h to determine the percentages of infected cells, the numbers of *T. gondii*-containing vacuoles and tachyzoites per 100 cells as well as the numbers of parasites per vacuole. Toxoplasmodicidal activity observed in cells deficient in EGFR, Src, AKT and STAT3 was reported previously (Muniz-Feliciano *et al.*, 2013, Portillo *et al.*, 2017). Results are shown as the mean  $\pm$  SEM of a representative experiment out of 2-3 independent experiments. \*\*  $P < 0.01$ ; \*\*\*  $P < 0.001$

Figure S1

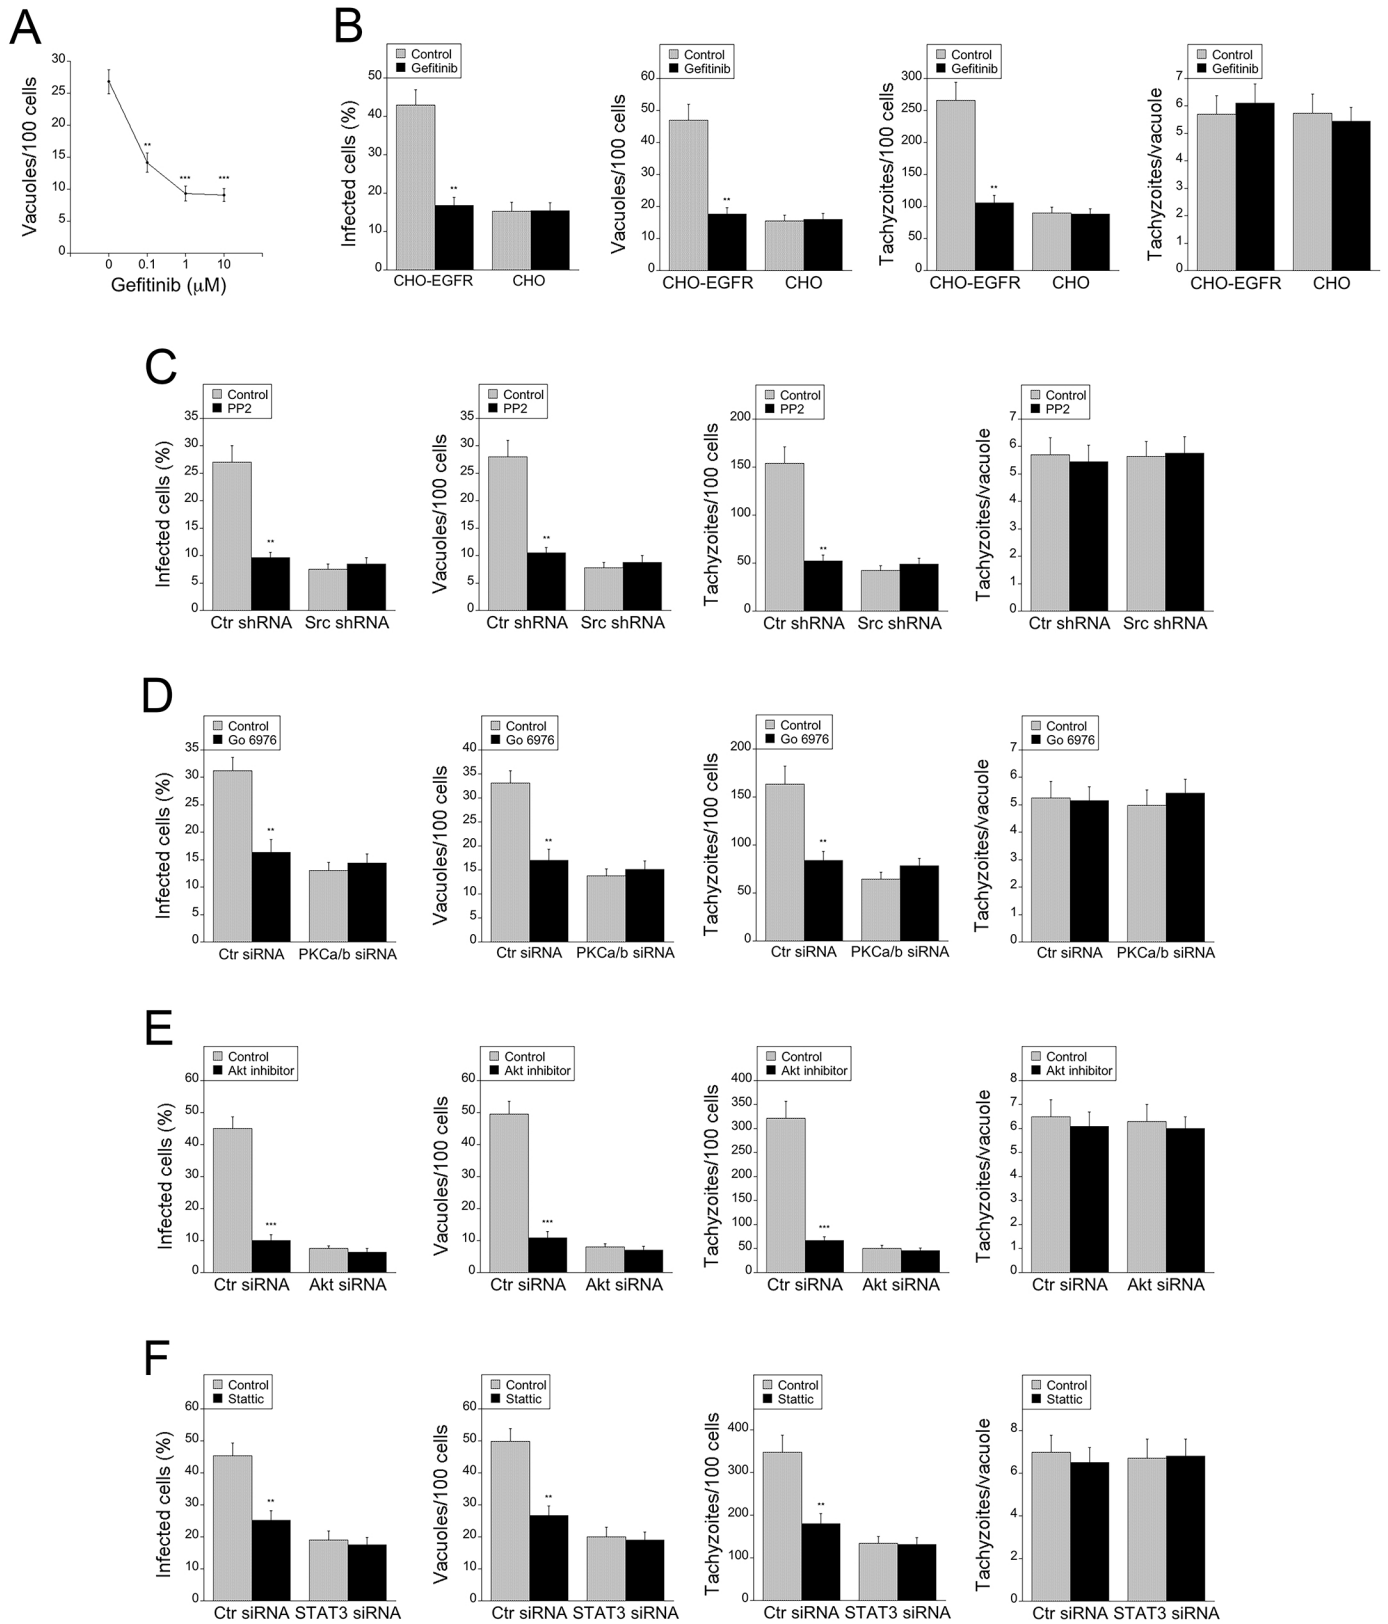

Supplement: CMI-21-na-s001.pdf [file CMI-21-na-s001.pdf]
